# Supplementary material
Source: PubMed Central journal article supplement (PMC514454)

A

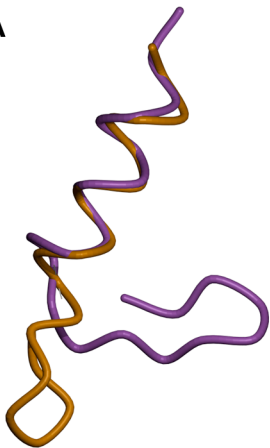

B

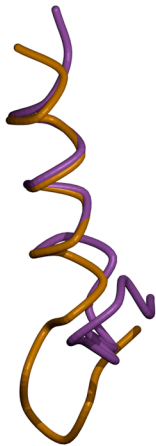

Supplement: pnas_101_33_12183__2.pdf [file pnas_101_33_12183__2.pdf]

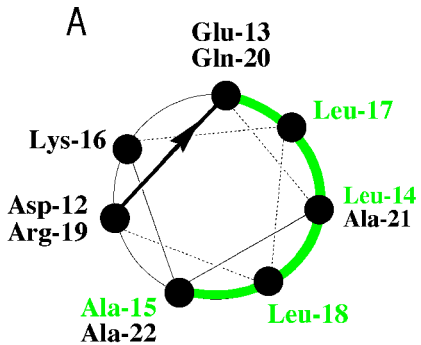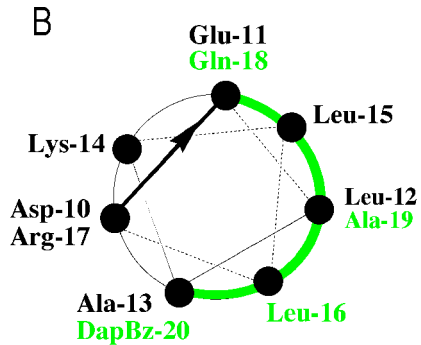

Supplement: pnas_101_33_12183__3.pdf [file pnas_101_33_12183__3.pdf]
